# Supplementary material for: 1H NMR studies distinguish the water soluble metabolomic profiles of untransformed and RAS-transformed cells
Source: PeerJ. 2016 Jun 7;4:e2104. doi: 10.7717/peerj.2104 (PMC4906648; doi:10.7717/peerj.2104)
Supplement: Data S1 — NMR sample metabolite concentration for N = 8, N = 10, N = 9, and N = 7 Biological replicates for the control (P) cells and NRAS-, KRAS-, and HRAS-transformed cells along with moxi cell counts for cells used to make those particular samples. [file peerj-04-2104-s006.xlsx]

## Sheet: Sheet1
Compound Name	p1w	p2w	p3w	p4w	p6w	p8w	p9w	p10w	N1w	N2W	N3W	N4w	N5W	N6w	N7w	N8W	N9w	N10w	K1w	K3w	K4w	K5w	K6W	K7w	K8W	K9W	K10w	H1W	H2W	H3W	H5W	H6W	H7W	H9W
Acetate	0.0053	0.00366	0.00493	0.00499	0.0025	0.00459	0.00985	0.00828	0.00737	0.00646	0.00534	0.00512	0.01102	0.00266	0.00659	0.00663	0.00746	0.00905	0.00618	0.00416	0.00537	0.00295	0.00497	0.00322	0.00415	0.01945	0.01227	0.00507	0.00417	0.0043	0.0154	0.00934	0.00876	0.01099
Alanine	0.00997	0.00692	0.00545	0.00638	0.0082	0.00776	0.01025	0.00856	0.02091	0.01972	0.01541	0.01555	0.02192	0.00532	0.01713	0.02032	0.0191	0.01812	0.01636	0.01038	0.01336	0.02269	0.02054	0.01761	0.0187	0.03402	0.0098	0.01542	0.01557	0.01031	0.03176	0.01939	0.01925	0.01753
β-Alanine	0.00128	0.00369	0.00043	0.00129	0.0012	0.00172	0.00275	0.00322	0.0105	0.00946	0.01022	0.00847	0.00205	0.00137	0.00671	0.00284	0.01865	0.00521	0.01277	0.01036	0.01467	0.01202	0.00782	0.00867	0.01188	0.01845	0.00426	0.01001	0.00736	0.00234	0.01167	0.00219	0.00732	0.00649
Arginine	0.01257	0.00889	0.00668	0.00484	0.0032	0.00484	0.01551	0.0081	0.01123	0.01089	0.01207	0.01519	0.02146	0.00629	0.00783	0.01604	0.01389	0.01317	0.0143	0.00444	0.0124	0.0149	0.01305	0.01576	0.0208	0.02454	0.01003	0.00621	0.01324	0.00787	0.02402	0.0014	0.01215	0.01206
AXP	0.02584	0.01925	0.01725	0.01881	0.0264	0.02832	0.02236	0.01953	0.04088	0.03775	0.0316	0.03734	0.02901	0.01245	0.03091	0.04109	0.03479	0.02967	0.0332	0.02912	0.03704	0.04482	0.04923	0.03623	0.04096	0.04381	0.02866	0.02637	0.02889	0.02191	0.03985	0.03107	0.02998	0.02533
Aspartate	0.01395	0.00472	0.00833	0.01094	0.0081	0.01108	0.01088	0.01137	0.01765	0.01425	0.01179	0.01003	0.00436	0.00432	0.00938	0.01937	0.01532	0.01122	0.00784	0.0049	0.00809	0.00458	0.00201	0.00314	0.00264	0.00307	0.00287	0.01025	0.01223	0.00898	0.00279	0.0026	0.00563	0.00601
Choline	0.00643	0.00399	0.0038	0.00399	0.0042	0.00494	0.00637	0.00634	0.00944	0.01061	0.00959	0.011	0.01401	0.00447	0.00938	0.0107	0.01477	0.0134	0.01377	0.00904	0.01177	0.01217	0.0141	0.01224	0.01596	0.02451	0.00711	0.00824	0.00942	0.00782	0.02075	0.01372	0.01185	0.01073
choline alfoscerate	0.00122	0.00088	0.00038	0.00069	0	0	0.00269	0.00112	0.0023	0.00247	0.00294	0.00248	0.00314	0.00099	0.00253	0.0023	0.00375	0.00296	0.00123	0.00099	0.00131	0.00061	0.00051	0.00137	0.00164	0.00367	0.00078	0.00107	0.00143	0.00126	0.0033	0.0031	0.00169	0.00253
Citrate	0.00383	0.00298	0.0011	0.00129	0.0017	0.0013	0.00103	0.0012	0.00039	0.00321	0.0041	0.0013	0.00248	0.00025	0.00307	0.00594	0.00205	0.00313	0.00264	0.00487	0.00229	0.00357	0.0061	0.00423	0.00318	0.00154	0.00124	0.00253	0.00387	0.00216	0.00852	0.00089	0.0024	0.00197
Creatine	0.01285	0.00985	0.00878	0.01032	0.0156	0.01841	0.01954	0.01899	0.02564	0.02425	0.02348	0.02499	0.03725	0.01006	0.01986	0.02331	0.03126	0.02902	0.03043	0.02587	0.03001	0.03181	0.0366	0.03241	0.0375	0.05441	0.01873	0.01793	0.01849	0.01922	0.0523	0.03428	0.02869	0.02734
Creatine phosphate	0.01767	0.01334	0.01078	0.01274	0.0088	0.00733	0.00539	0.00164	0.03097	0.02234	0.01979	0.02302	0.01059	0.00634	0.02141	0.03006	0.02778	0.0229	0.02583	0.02059	0.0246	0.02674	0.02908	0.0209	0.02456	0.0274	0.012	0.02364	0.02547	0.01567	0.02889	0.01659	0.01728	0.00961
Formate	0.00691	0.00869	0.00923	0.00425	0	0.00586	0.01035	0.0068	0.00649	0.00524	0.00681	0.00762	0.00844	0.00092	0.00763	0.00294	0.00726	0.00291	0.0051	0.00594	0.00479	0	0	0	0	0.01467	0.01419	0.00648	0.00794	0.00418	0.01451	0.01041	0.00682	0.00762
Fumarate	0	0	0.00138	0	0	0	0	0	0.00414	0.00364	0.0038	0.0034	0.0021	0.0006	0.00198	0.00223	0.00173	0.00114	0.00374	0.00195	0.00214	0.00443	0.00479	0.00284	0.0031	0.00554	0.00154	0.00204	0.00178	0.00156	0.00416	0.00244	0.00172	0.00135
Glutamate	0.1443	0.09199	0.08016	0.08571	0.089	0.10807	0.11363	0.09698	0.15982	0.13769	0.1385	0.13418	0.10895	0.04094	0.12345	0.16888	0.14301	0.14375	0.14669	0.12494	0.14026	0.17687	0.17114	0.14906	0.15427	0.22411	0.08857	0.1347	0.13953	0.1062	0.18959	0.12952	0.11598	0.08814
Glutamine	0.02951	0.02105	0.0144	0.02189	0.017	0.02485	0.02937	0.0239	0.05229	0.04452	0.03079	0.02524	0.01918	0.00753	0.0391	0.05171	0.03326	0.03263	0.02257	0.02156	0.01759	0.03884	0.0201	0.02747	0.02039	0.0377	0.01598	0.04442	0.05521	0.02873	0.04695	0.02847	0.042	0.02354
Glutathione	0.01099	0.01021	0.01	0.01055	0.0073	0.00916	0.01692	0.01158	0.01863	0.01817	0.01171	0.01726	0.01781	0.00522	0.01057	0.01425	0.01449	0.0163	0.01744	0.01544	0.01658	0.01806	0.0131	0.02323	0.01334	0.02491	0.01175	0.01179	0.01329	0.01321	0.01781	0.0228	0.01056	0.01027
Glycine	0.02015	0.01453	0.0129	0.01556	0.0176	0.01946	0.01952	0.01672	0.02649	0.02211	0.01974	0.01898	0.02088	0.00678	0.02329	0.02572	0.0253	0.02462	0.02317	0.01729	0.02301	0.03054	0.03109	0.02767	0.03363	0.05697	0.01366	0.01817	0.01884	0.0125	0.04601	0.02501	0.02149	0.01889
Isocitrate	0.01561	0.01152	0.01795	0.01204	0.0055	0.01055	0.00919	0.01434	0.01904	0.0172	0.0085	0.01752	0.01041	0.00442	0.01003	0.02676	0.01479	0.01466	0.02018	0.01226	0.01237	0.01225	0.01956	0.00859	0.0199	0.01787	0.00834	0.01083	0.00761	0.00551	0.01867	0.01504	0.01947	0.01178
Isoleucine	0.00482	0.00303	0.00293	0.00415	0.0041	0.00531	0.00604	0.00404	0.00706	0.00595	0.00466	0.00575	0.00585	0.00231	0.00497	0.00555	0.00696	0.00551	0.00716	0.00637	0.0065	0.00619	0.006	0.00704	0.00584	0.0121	0.00766	0.00581	0.00618	0.0043	0.00918	0.00779	0.0053	0.00468
Lactate	0.09674	0.06468	0.06231	0.07486	0.097	0.11623	0.13297	0.13524	0.17366	0.20699	0.19014	0.18899	0.35498	0.07361	0.15978	0.16772	0.17637	0.19309	0.19811	0.13243	0.17148	0.21476	0.26461	0.23825	0.2829	0.51458	0.15781	0.13994	0.14559	0.13852	0.44605	0.28202	0.23672	0.25195
Leucine	0.00482	0.00379	0.00295	0.00401	0.0047	0.00646	0.00544	0.00478	0.00732	0.00832	0.00754	0.00798	0.01231	0.00296	0.00636	0.00896	0.00806	0.00791	0.00739	0.00741	0.00877	0.00749	0.01009	0.00742	0.00779	0.01787	0.00751	0.00579	0.00879	0.00694	0.0192	0.01193	0.00783	0.00935
Malate	0.01492	0.01023	0.00708	0.015	0.0113	0.00998	0.02241	0.02577	0.0296	0.02987	0.02295	0.01946	0.03601	0.00994	0.02709	0.0381	0.02918	0.02715	0.02108	0.02191	0.02386	0.0233	0.03227	0.02438	0.02531	0.04814	0.02072	0.01497	0.01768	0.01768	0.03784	0.02662	0.00798	0.02796
myo-Inositol	0.13517	0.09331	0.08111	0.09089	0.1038	0.12267	0.11854	0.1138	0.0764	0.0693	0.06746	0.07098	0.06385	0.02636	0.06175	0.08101	0.09	0.08109	0.11198	0.09407	0.10969	0.10729	0.10165	0.10949	0.12822	0.1642	0.0583	0.06478	0.07578	0.05328	0.12464	0.07723	0.07016	0.06225
N-Acetylaspartate	0.0027	0.00207	0.00165	0.00227	0.0021	0.00237	0.00247	0.00271	0.00323	0.00211	0.00137	0.00169	0.00033	0.00035	0.00144	0.00105	0.0003	0.00243	0.00118	0.00178	0.00154	0	0.00188	0.00182	0.00289	0.00453	0.00166	0.00094	0.00276	0.00128	0.00421	0.00224	0.00351	0.00314
N-Acetylcysteine	0.00385	0.00187	0.00148	0.00292	0.0008	0.00394	0.00368	0.00429	0.00323	0.01794	0.01526	0.01724	0.01652	0.00574	0.01606	0.0196	0.0223	0.01888	0.01375	0.01574	0.01585	0.00927	0.01526	0.01211	0.01324	0.00876	0.01394	0.00708	0.00711	0.00636	0.0154	0.00583	0.00803	0.00892
N-AcetylY	0.00194	0.00121	0.0009	0.00074	0.0008	0.00112	0.00144	0.00056	0.0038	0.00265	0.0018	0.00105	0.00013	0.00117	0.00238	0.00271	0.00265	0.00126	0.00254	0.00025	0.00333	0.0016	0.01068	0.00352	0.00254	0.00377	0.00232	0.00169	0.00309	0.00184	0.00728	0.00265	0.00326	0.0044
NADZ	0	0	0.0049	0.003	0	0.0035	0	0.0023	0.00466	0.00354	0.00496	0.00639	0.00426	0.00179	0.00312	0.00489	0.0003	0	0.00573	0.00591	0.00441	0	0.00808	0.00372	0.00466	0.00496	0.00134	0.00546	0.00505	0	0.01083	0.00443	0	0
NADPZ	0.0065	0	0.0044	0.0027	0.0001	0.0045	0.0117	0.0025	0.00202	0.00015	0.00119	0.00105	0.00139	0	0.00251	0.0013	0	0.00202	0.00518	0	0.00156	0.00387	0.0017	0.00317	0.00067	0.00337	0.00139	0	0.00279	3e-05	0	0.00059	0	0
Phenylalanine	0	0	0	0	0	0	0.00025	0.00164	0.00347	0.0044	0.00387	0.00307	0.00747	0.00134	0.00492	0.00384	0.00486	0.00523	0.00364	0.00284	0.00345	0	0.00458	0	0.00289	0.00959	0.00386	0.00395	0	0	0.01174	0.00791	0.00523	0.00634
Phosphocholine	0.07235	0.04947	0.04118	0.05111	0.0494	0.06017	0.05513	0.05253	0.0163	0.0143	0.01184	0.01361	0.01049	0.00442	0.01234	0.01558	0.01357	0.01231	0.03046	0.02501	0.03137	0.03624	0.03528	0.03256	0.03294	0.04525	0.02294	0.0177	0.01811	0.01444	0.03097	0.02	0.01758	0.01464
Proline	0.02525	0.01693	0.01443	0.01	0.0143	0.01759	0.01854	0.02137	0.03384	0.03867	0.03694	0.03606	0.03274	0.01553	0.03013	0.04498	0.05083	0.03716	0.04918	0.03466	0.0471	0.05099	0.03629	0.04105	0.04265	0.07673	0.02833	0.02719	0.02477	0.01575	0.05245	0.03313	0.03127	0.03018
Pyruvate	0.00079	0.00136	0.00055	0.00078	0.0009	0.0007	0.0003	0.00031	0.00261	0.00275	0.00132	0.00061	0.0016	0.00027	0.00177	0.00049	0.00038	0.00104	0	0.00185	0.00141	0.0015	0.00167	0.00081	0.00115	0.00138	0.00025	0.00137	0.00241	0.00065	0.00216	0.00206	0.00268	0.00118
Succinate	0.00105	0.00078	0.00085	0.00159	0.0011	0.00125	0.00264	0.00207	0.00256	0.00298	0.00248	0.00269	0.00367	0.00089	0.00185	0.00246	0.00198	0.00205	0.00214	0.00183	0.00214	0.00244	0.00244	0.00223	0.00272	0.00433	0.00159	0.00194	0.00116	0.00138	0.00355	0.00262	0.00205	0.00245
Taurine	0.05981	0.0451	0.03645	0.04516	0.0496	0.05501	0.05397	0.0524	0.0244	0.02157	0.02133	0.02404	0.01373	0.00733	0.02668	0.02346	0.02776	0.02462	0.03403	0.034	0.04128	0.04103	0.05528	0.04348	0.0388	0.04879	0.01704	0.02547	0.01994	0.01876	0.035	0.0268	0.01573	0.01117
Tyrosine	0	0	0	0.00112	0	0.00022	0.0001	0.00396	0.00473	0.00524	0.00504	0.00501	0.00519	0.00102	0.00403	0.00402	0.0034	0.00341	0.00538	0.00383	0.00406	0	0.00409	0.00413	0.00443	0.00805	0.00224	0.00484	0.00404	0.00377	0.01015	0.0056	0.00538	0.0058
UDP-X	0.00877	0.00773	0.00835	0.00728	0.0057	0.00818	0.00942	0.00593	0.03677	0.03249	0.02434	0.032	0.02356	0.01011	0.02539	0.03188	0.03449	0.02912	0.02674	0.02826	0.03037	0.02447	0.021	0.019	0.01993	0.02798	0.02082	0.01445	0.01356	0.01383	0.02942	0.0155	0.01488	0.01211
Valine	0.0053	0.00321	0.0029	0.00437	0.004	0.00484	0.00456	0.00458	0.00603	0.00613	0.00554	0.00604	0.00775	0.00234	0.00504	0.00568	0.00683	0.00612	0.00618	0.0066	0.00615	0.00624	0.00685	0.00633	0.00707	0.01205	0.00491	0.00581	0.00517	0.0046	0.01377	0.00934	0.00687	0.00647
DSS	0.12484	0.12484	0.12484	0.12484	0.12484	0.12484	0.12484	0.12484	0.12484	0.12484	0.12484	0.12484	0.12484	0.12484	0.12484	0.12484	0.12484	0.12484	0.12484	0.12484	0.12484	0.12484	0.12484	0.12484	0.12484	0.12484	0.12484	0.12484	0.12484	0.12484	0.12484	0.12484	0.12484	0.12484
	p1w	p2w	p3w	p4w	p6w	p8w	p9w	p10w	N1w	N2W	N3W	N4w	N5W	N6w	N7w	N8W	N9w	N10w	K1w	K3w	K4w	K5w	K6W	K7w	K8W	K9W	K10w	H1W	H2W	H3W	H5W	H6W	H7W	H9W
Moxi Cell counts	11560000	10200000	10600000	11320000	11160000	11320000	11760000	11040000	18990000	1.407e+07	1.623e+07	1.704e+07	15750000	18030000	1.503e+07	15840000	16050000	14250000	1.473e+07	1.647e+07	1.422e+07	13800000	1.383e+07	16410000	15000000	16140000	13110000	13140000	10860000	18270000	18690000	16140000	1.557e+07	19110000
