# Supplementary material for: 1H NMR studies distinguish the water soluble metabolomic profiles of untransformed and RAS-transformed cells
Source: PubMed Central journal article supplement (PMC4906648; doi:10.7717/peerj.2104), 2016-06-07

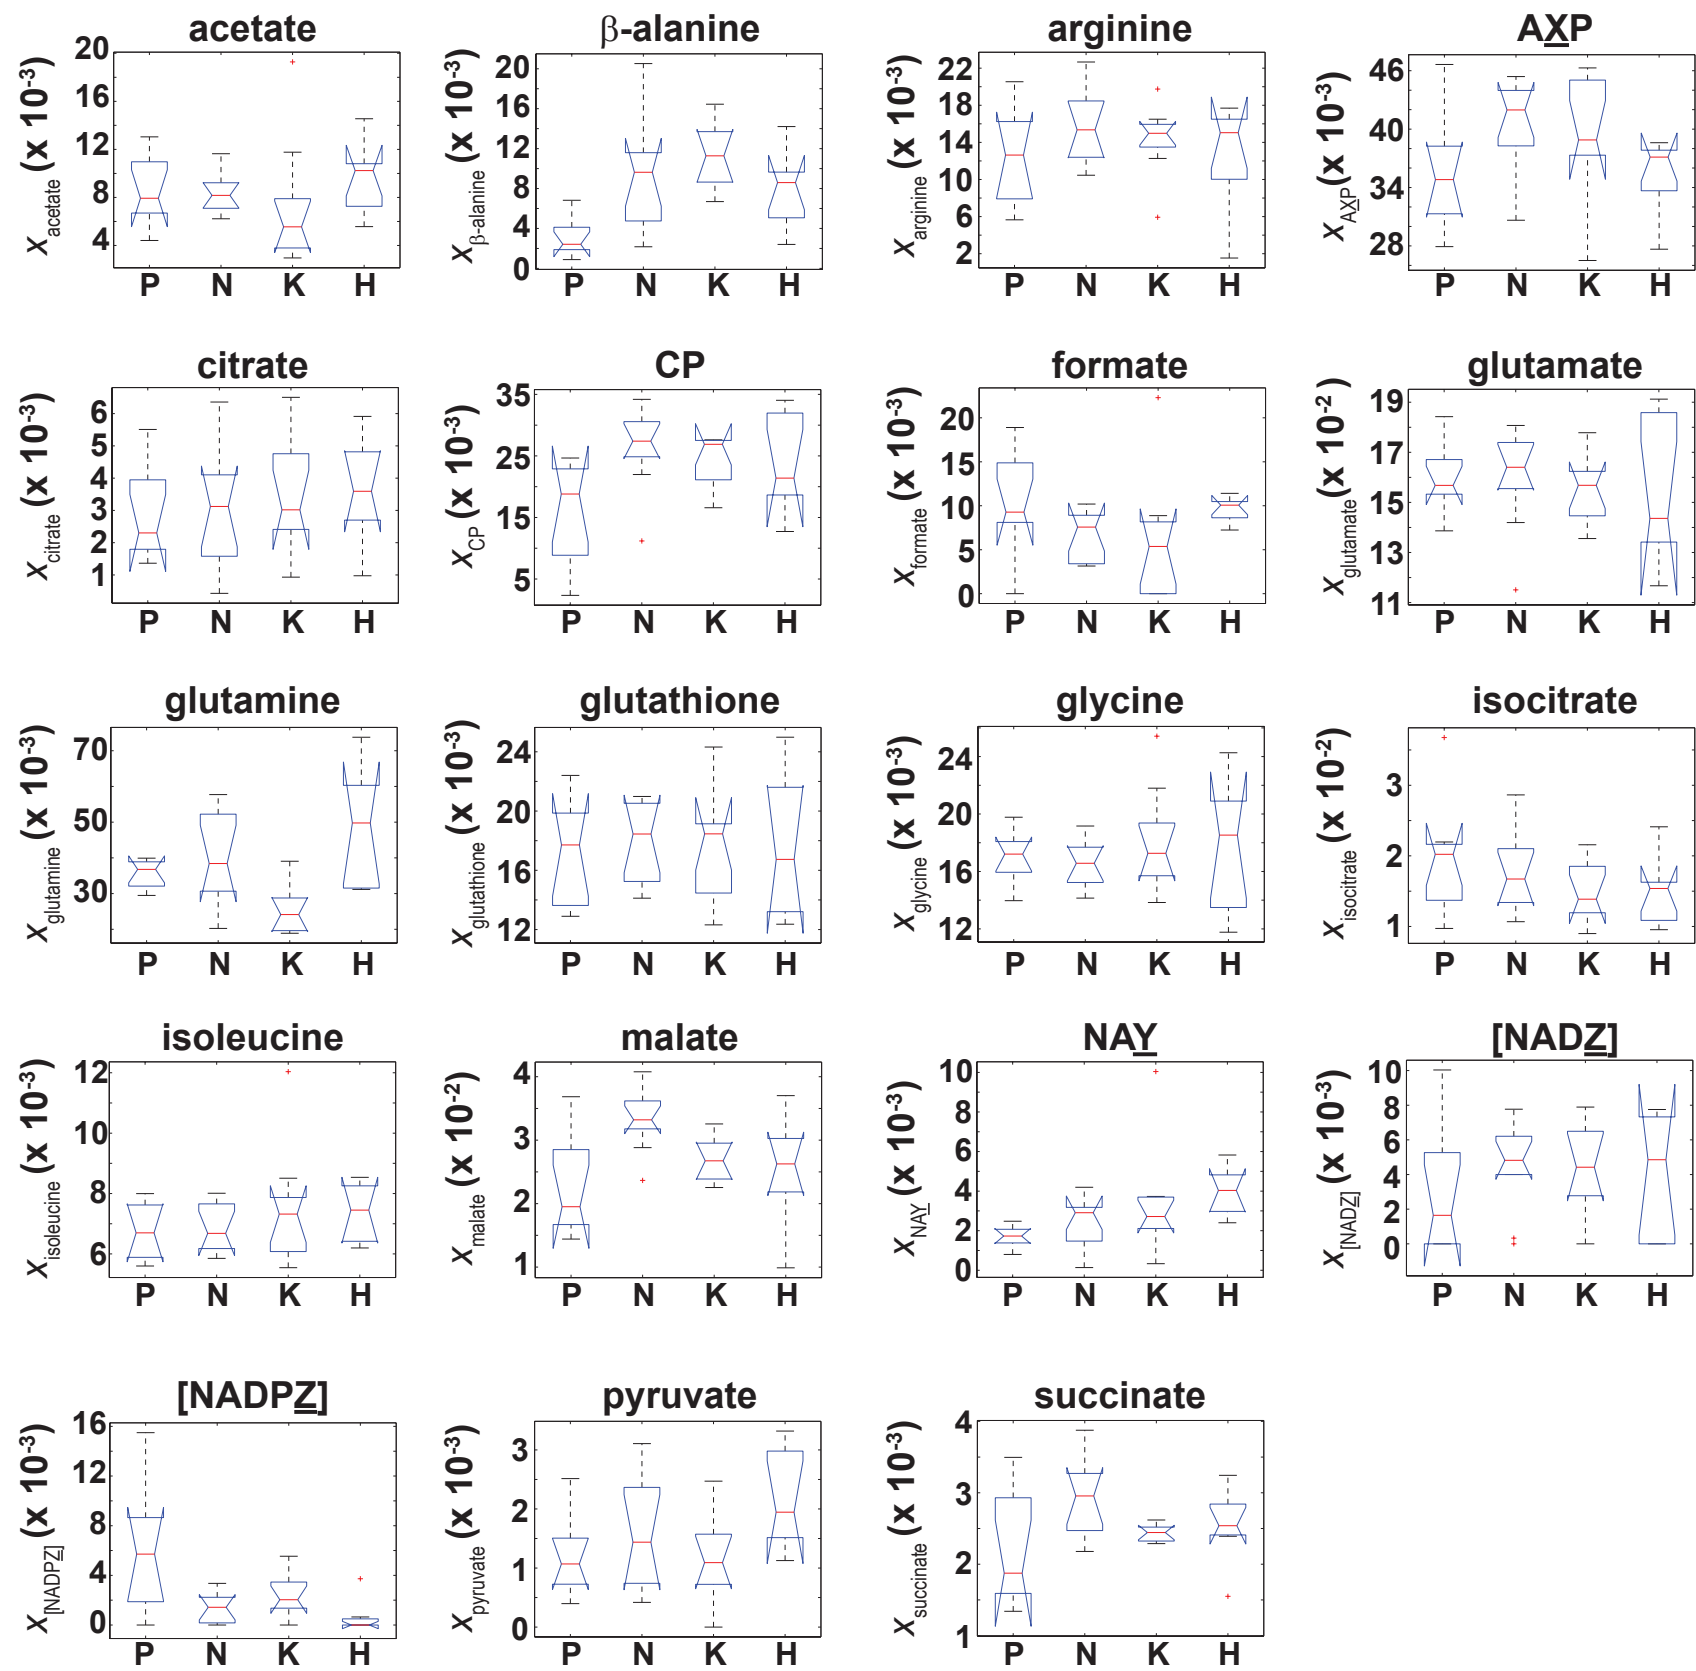

Supplement: peerj-04-2104-s003.pdf [file peerj-04-2104-s003.pdf]
